# Supplementary material
Source: PubMed Central journal article supplement (PMC4750654)
Supplement: AAC.01968-15_zac002164823so1.pdf [file AAC.01968-15_zac002164823so1.pdf]

## Supplementary material

**Table S1** Vancomycin dosing recommendations in neonates and children according to dosing regimens suggested in reference books evaluated

| Reference                                           | PMA         | PNA              | Dose                                  |
|-----------------------------------------------------|-------------|------------------|---------------------------------------|
| Dutch Children's Formulary (2013) (37)              | -           | <1 week          | 20 mg/kg/day in 2 doses               |
|                                                     |             | 1-4 weeks        | 30 mg/kg/day in 3 doses               |
|                                                     |             | 1 month-18 years | 40 mg/kg/day in 3 doses               |
| British National Formulary for children (2009) (38) | <29 weeks   | -                | 15 mg/kg/day in 1 dose                |
|                                                     | 29-35 weeks |                  | 30 mg/kg/day in 2 doses               |
|                                                     | >35 weeks   |                  | 45 mg/kg/day in 3 doses               |
|                                                     | -           | 1 month-18 years | 45 mg/kg/day in 3 doses (max 2 g/day) |
| IDSA (2011) (39)                                    |             | All ages         | 60 mg/kg/day in 4 doses               |
| NeoFax – meningitis (2011) (40)                     | ≤29 weeks   | 0-14 days        | 15 mg/kg q18h                         |
|                                                     |             | >14 days         | 15 mg/kg q12h                         |
|                                                     | 30-36 weeks | 0-14 days        | 15 mg/kg q12h                         |
|                                                     |             | >14 days         | 15 mg/kg q8h                          |
|                                                     | 37-44 weeks | 0-7 days         | 15 mg/kg q12h                         |
|                                                     |             | >7 days          | 15 mg/kg q8h                          |
| ≥45 weeks                                           | -           |                  | 15 mg/kg q6h                          |

PMA: postmenstrual age (gestational age + postnatal age); PNA: postnatal age

**Table S2** Characteristics of six representative individuals used for simulations

| ID | GA (weeks) | bBW (g) | PNA      | cBW (kg) |
|----|------------|---------|----------|----------|
| 1  | 24         | 600     | 14 days  | 0.64     |
| 2  | 34         | 2,270   | 14 days  | 2.27     |
| 3  | 40         | 2,980   | 14 days  | 2.85     |
| 4  | -          | -       | 6 months | 6        |
| 5  | -          | -       | 4 years  | 16       |
| 6  | -          | -       | 12 years | 45       |

bBW: birth bodyweight; cBW: current bodyweight; GA: gestational age; PNA: postnatal age
